# Supplementary material for: Black phosphorus nonvolatile transistor memory
Source: Royal Society of Chemistry journal article supplement (doi:10.1039/c6nr02078j), 2016-01-01
Supplement: c6nr02078j1.pdf [file c6nr02078j1.pdf]

Supporting information for

## Black Phosphorus Nonvolatile Transistor Memory

Dain Lee,<sup>1†</sup> Yongsuk Choi,<sup>1†</sup> Euyheon Hwang,<sup>1,2</sup> Moon Sung Kang,<sup>4</sup> Seungwoo Lee,<sup>1,3</sup> and Jeong Ho Cho<sup>1,3\*</sup>

<sup>1</sup>SKKU Advanced Institute of Nanotechnology (SAINT), <sup>2</sup>Department of Physics, <sup>3</sup>School of Chemical Engineering, Sungkyunkwan University, Suwon 16419, Korea.

<sup>4</sup>Department of Chemical Engineering, Soongsil University, Seoul 156–743, Korea.

Corresponding author E-mail: [jhcho94@skku.edu](mailto:jhcho94@skku.edu)

<sup>†</sup>D. Lee and Y. Choi contributed equally this work.

### Experimental section

**Device fabrication:** The nano floating gate transistor memories (NFGTMs) with few-layer black phosphorus (BP) were fabricated onto a heavily-doped Si wafer with a 300 nm-thick SiO<sub>2</sub> layer, where Si was utilized as the gate electrode, while SiO<sub>2</sub> was utilized as the blocking gate dielectric layer. The SiO<sub>2</sub> surface was cleaned by UV/ozone treatment (254 nm, 28 mW/cm<sup>2</sup>) for 15 minutes. The AuNPs with a diameter of around 9 nm were deposited by thermal evaporation method onto SiO<sub>2</sub> substrate at a rate of 0.01 nm/s. The propylene glycol monomethyl ether acetate (PGMEA) solution composed of 1 wt% poly-4-vinylphenol (PVP,  $M_w = 20,000$  g mol<sup>-1</sup>) and 0.5 wt% poly(melamine-co-formaldehyde) (PMF,  $M_w = 511$  g mol<sup>-1</sup>) was spin-coated onto the AuNPs/SiO<sub>2</sub>/Si substrate. The resulting film was thermally annealed in vacuum oven at 180 °C for 2 hrs to generate cross-linking of PVP. Few-layer BP flakes were exfoliated mechanically from bulk BP crystals using a Scotch adhesive tape and then transferred onto the cross-linked PVP (cPVP) surface in an Ar glove box to prevent degradation induced by the exposure of the material to water or oxygen during the fabrication processes. The source/drain electrodes (Ni/Au thickness = 20/40 nm) were defined through conventional e-beam lithography processes. Finally, the devices were passivated by spin-coating of 200 nm thick-PMMA ( $M_w = 200,000$ ) and subsequent baking at 200 °C for 15 minutes.

**Measurements:** The surface morphology of the mechanically-exfoliated BP flake was obtained by a tapping-mode atomic force microscopy (AFM, D3100 Nanoscope V, Veeco). Raman spectrum was measured by a confocal Raman microscope (Alpha 300R, Witec). The electrical properties of the BP-NFGTMs were measured using Keithley 2400 and 236 source/measure units at room temperature in the dark under vacuum ( $\sim 10^{-4}$  Torr).

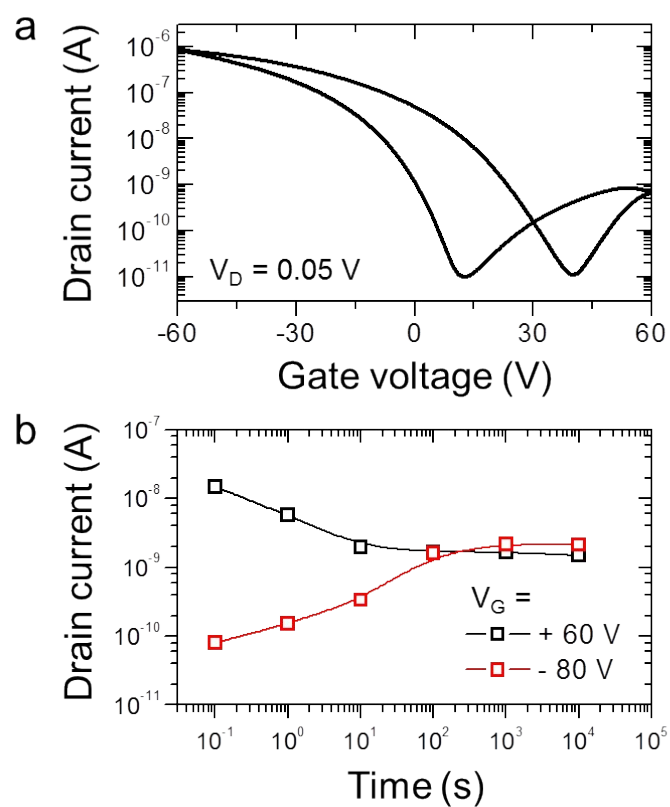

**Figure S1.** (a) Transfer characteristics and (b) Retention time characteristics of the BP transistors without AuNPs.
